# Supplementary material for: Impact of mRNA chemistry and manufacturing process on innate immune activation
Source: PubMed Central journal article supplement — Sci Adv. 2020 Jun 24;6(26):eaaz6893. doi: 10.1126/sciadv.aaz6893 (PMC7314518; doi:10.1126/sciadv.aaz6893), 2020-06-24

[advances.sciencemag.org/cgi/content/full/6/26/eaaz6893/DC1](https://advances.sciencemag.org/cgi/content/full/6/26/eaaz6893/DC1)

## Supplementary Materials for

### **Impact of mRNA chemistry and manufacturing process on innate immune activation**

Jennifer Nelson, Elizabeth W. Sorensen, Shrutika Mintri, Amy E. Rabideau, Wei Zheng, Gilles Besin, Nikhil Khatwani, Stephen V. Su, Edward J. Miracco, William J. Issa, Stephen Hoge, Matthew G. Stanton, John L. Joyal\*

\*Corresponding author. Email: [john.joyal@modernatx.com](mailto:john.joyal@modernatx.com)

Published 24 June 2020, *Sci. Adv.* **6**, eaaz6893 (2020)  
DOI: 10.1126/sciadv.aaz6893

#### **This PDF file includes:**

Tables S1 to S7  
Figs. S1 to S3

## Supplemental Figures and Tables

**Table S1-S4. Detailed gene lists, as shown from top to bottom for heat maps Figure 4E (Table S1), Figure 6 and Supplemental Figure S3A (Table S2), Supplemental Figure S3B (Table S3), and Supplemental Figure S3C (Table S4).** The genes of the heat maps were grouped by hierarchical clustering using Pearson's correlation between genes as similarity/distance measure and average.

**Table S5. Two-way ANOVA results for Figure 5A.** The table represents the results from a 2-way ANOVA with Sidak's multiple comparisons post-test to compare WT to MAVS<sup>-/-</sup> mice, and Tukey's multiple comparisons post-test to compare treatment groups within a mouse strain from the serum hEPO quantitation data presented in Figure 5A.

**Table S6. Two-way ANOVA results for Figure 5B.** The table represents the results from a 2-way ANOVA with Sidak's multiple comparisons post-test to compare WT to MAVS<sup>-/-</sup> mice, and Tukey's multiple comparisons post-test to compare treatment groups within a mouse strain from the serum IFN $\alpha$  quantitation data presented in Figure 5B.

**Table S7. Two-way ANOVA results for Figure 5C.** The table represents the results from a 2-way ANOVA with Sidak's multiple comparisons post-test to compare WT to MAVS<sup>-/-</sup> mice, and Tukey's multiple comparisons post-test to compare treatment groups within a mouse strain from the activated B cells in the spleen data presented in Figure 5C.

**Figure S1. NF- $\kappa$ B promoter activation in THP1-Dual, and A549-Dual cells.** NF- $\kappa$ B promoter activation associated with mRNA transfected in THP1-Dual and A549-Dual cells, or TLR 7/8 (R848 and TL8506), RIG-I (5'ppp-dsRNA and 5'ppp-hpRNA) and STING (2'3'-cGAMP) agonists into (A) THP1-Dual cells, (B) MAVS<sup>-/-</sup> THP1-Dual cells, (C) MyD88<sup>-/-</sup> THP1-Dual cells, (D) A549-Dual cells, and (E) RIG-I<sup>-/-</sup> A549-Dual cells was

examined. NF- $\kappa$ B promoter activity (**A-E**) was measured through secreted alkaline phosphatase (SEAP) activity by a color-change substrate and reported as OD reading at 365nm. Data were from a single experiment, with n = 2-3 technical replicates.

**Figure S2. Immune activation from hEPO mRNA incorporating uridine or 1m $\Psi$ , made by Process A or B; or poly(U) 19mer, poly(1m $\Psi$ ) 19mer, 5'ppp-hpRNA, R848 and poly(I:C) in B6129SF2/J control or MAVS<sup>-/-</sup> mice (5 mice/group) at 6 hours post-injection.** The level of (**A**) CCL4 and (**B**) CCL5 in serum was measured by Luminex. (**C**) The percentage of total (CD19<sup>+</sup>) B cells in spleen was determined by flow cytometric analysis.

**Figure S3. Immune activation from PBS, 5'ppp-hpRNA, R848, and poly(I:C) in B6129SF2/J control and MAVS<sup>-/-</sup> mice (5 mice/group) at 6 hours post-injection.** Expression of splenic genes included in the Mouse Myeloid Innate Immunity Panel (**A**), represented as Z-score, was evaluated by Nanostring analysis. Gene sets were grouped based on a cluster analysis of treatment groups with, (**B**) B6129SF2/J control and (**C**) MAVS<sup>-/-</sup> mice.

**Table S1. Heatmap gene order for Figure 4E (C57BL/6).**

Shown top to bottom on heatmap.

|         |         |           |         |          |           |          |          |
|---------|---------|-----------|---------|----------|-----------|----------|----------|
| Cebpa   | Nr2f6   | Adamts17  | Fcgr1   | Irf7     | Birc2     | Il3ra    | Fpr-rs5  |
| Cd163   | Itgam   | Ccl27a    | Ccr5    | Isg15    | Cd40      | Tnfaip6  | Ccl17    |
| Csf1r   | Igf1    | Ephb6     | Cd276   | Stat1    | Serpib9   | Rhoc     | Cxcl3    |
| Hpgd    | Daglb   | Rgs6      | Casp1   | Ccl12    | Lif       | Tgm2     | Olr1     |
| Mrc1    | Ceacam1 | Cd209e    | C3      | H2-T23   | Il33      | Myc      | Scin     |
| Acot11  | Sema6d  | Havcr1    | Casp7   | Trex1    | Socs2     | Cd69     | Fzd9     |
| Xcr1    | Pglyrp1 | Rasgrf2   | Klrk1   | Dpp4     | Jun       | Peli1    | Aif1     |
| Tlr11   | Ccl6    | Chil3     | Plau    | Sell     | Ifnb1     | Il15     | Ros1     |
| Itgax   | Ccr3    | Chil4     | Kitl    | Mmp13    | Ccr7      | Txn1     | Pdzk1ip1 |
| Cav1    | Ccr2    | Mmp8      | Rin2    | Tlr3     | Fas       | Anxa4    | Mmp10    |
| Pparg   | Lrp5    | Ceacam2   | Cd38    | H2-Q1    | Traf1     | Cd86     | Hnf1b    |
| Cd244   | Tgfb3   | Cd1d2     | Lamb3   | Psmb9    | Marcks1   | Map2k1   | Cyr61    |
| Havcr2  | Cbr1    | Ccr6      | Tnf     | Tlr9     | Fscn1     | Acod1    |          |
| Clec9a  | Vsir    | Mmp12     | Sphk1   | Tnfsf10  | Icam1     | Flnb     |          |
| Clec1b  | Lipa    | Kit       | Tnfaip3 | Tapbp    | Gadd45b   | Ccl7     |          |
| S100a9  | Alox5ap | Ptger2    | Cd80    | Daxx     | Il1rn     | Il15ra   |          |
| S100a8  | Cx3cr1  | Thbd      | Crem    | Ifit1bl1 | Ccl4      | Ccl2     |          |
| Ly6g    | Mapk14  | S1pr1     | Ifna1   | Mx1      | Ccl3      | Ccl2     |          |
| Cxcr2   | Itgb7   | Fzd6      | Rgs16   | Trafd1   | Cdkn1a    | Clic4    |          |
| Cdh4    | Ptprb   | Ms4a2     | Cxcl5   | Ly6c1    | Nfkbiz    | Atf3     |          |
| Col15a1 | Il6ra   | Trem2     | Cxcl1   | Psmb8    | Emp1      | Vwa5a    |          |
| Ccl9    | Sema5a  | Il9       | Tnc     | Cybb     | Serpine1  | Cxcl9    |          |
| Pdgfrb  | Ifngr1  | Mrc2      | Il22    | Tap1     | Ccl5      | Cxcl11   |          |
| Id1     | Cxcr3   | Fabp4     | Ido1    | Amica1   | Tnfrsf12a | Irf1     |          |
| Csf3r   | Flt3    | Cd99      | Tnfsf4  | Cd274    | Maff      | Tap2     |          |
| H2-Q10  | Fcer2a  | Cxcl13    | Edn1    | Socs1    | Ccl11     | Stat3    |          |
| Nectin1 | Il27ra  | Cpa3      | Cd70    | Nampt    | Adamts4   | Hbegf    |          |
| Hdac6   | Rapgef4 | Siglec1   | Cx3cl1  | Cxcl10   | Il6       | Ldlr     |          |
| Dhrs3   | H2-Ob   | Ccl24     | Csf3    | Psme2    | Ifng      | Cxcl2    |          |
| Cd40lg  | Smarcd3 | Fgf10     | Sele    | Aoah     | Il27      | Rgs1     |          |
| Hdac5   | Tlr5    | Mok       | Cldn1   | Fcgr4    | Adora2a   | Rab20    |          |
| Ski     | Cysltr1 | Dusp2     | Fpr-rs3 | Lgals3   | Ptafr     | Hif1a    |          |
| Insr    | Tlr12   | Dusp1     | Gch1    | Ifit1bl2 | Clec5a    | Gem      |          |
| Mmp9    | Id3     | Ctla4     | Cnksr1  | Hdc      | Ripk2     | Nfil3    |          |
| Krba1   | Klf10   | Ptprk     | Klk1    | Kcnab1   | Osm       | Ptgs2    |          |
| H2-Eb1  | Hes1    | Hoxd4     | Gzma    | Il10     | F11r      | Cd83     |          |
| Itgb2   | Ctsa    | C3ar1     | Nox1    | Fosl1    | Cxcl16    | Areg     |          |
| Ptgs1   | Ltb4r1  | Nox4      | Serinc2 | Nod2     | Ccl8      | H2-Ea-ps |          |
| Alox5   | Mapk12  | Tnfrsf8   | Tlr7    | Il12b    | Tgfa      | Cxcl14   |          |
| Tm7sf3  | Cma1    | Tnfrsf11a | Usp18   | Socs3    | Il1a      | Cttnbp2  |          |
| Hspg2   | Ptpn14  | Fpr2      | Mx2     | Adamts9  | Lag3      | Fpr-rs4  |          |

**Table S2. Heatmap gene order for Figure 6 (Shown top to bottom on heatmap) and Figure S3A (Shown left to right on heatmap)**

|         |          |          |           |         |         |
|---------|----------|----------|-----------|---------|---------|
| Fcgr3   | Tlr7     | Ccl2     | Nfkbia    | Pdcd1   | Tek     |
| Cebpd   | DDX58    | Clic4    | Cd80      | Klk1    | Cd1d1   |
| Cyr61   | Trex1    | Il15ra   | Emp1      | Batf3   | Cd180   |
| Hdc     | Tapbp    | Atf3     | Maff      | Cx3cl1  | Xcr1    |
| Il1r2   | Trafd1   | Cd274    | Serpine1  | Ngf     | Cxcl12  |
| Il1b    | Daxx     | Vwa5a    | Tnfrsf12a | Ly6g    | Ptprb   |
| Cd14    | Mx1      | Cxcl11   | Adamts9   | S100a9  | Sema5a  |
| Clec5a  | Tnfsf10  | Tlr9     | Il1a      | S100a8  | Csf1r   |
| C5ar1   | DHX58    | Kcnab1   | Hbegf     | Mmp8    | Tlr11   |
| Il1rap  | Usp18    | Klrk1    | Cdkn1a    | Ccr1    | Cd163   |
| Edn1    | Ifit1bl1 | Ifit1bl2 | Cebpb     | Cxcr2   | Mrc1    |
| Ptprk   | IFIH1 a  | Osm      | Rab20     | H2-Q10  | Hpgd    |
| Itga5   | IFIH1 b  | Cxcl1    | Tgm2      | Csf3r   | Col14a1 |
| Ier3    | Mx2      | Csf1     | Il33      | Prok2   | Cbr1    |
| Ifng    | Irf7     | Myd88    | Il1rn     | Sphk1   | Mafb    |
| Cxcl2   | Stat1    | Tgfa     | Rhoc      | Nos2    | Ptgs1   |
| Ccl11   | Isg15    | Rin2     | Enc1      | Fosl1   | Ccr3    |
| Plaur   | H2-Q1    | Sell     | Fas       | Trem1   | Cav1    |
| Ccr7    | H2-T23   | Cd86     | Ccl4      | Ear6    | Sema6d  |
| Cldn1   | Fcgr1    | Map2k1   | Tnf       | Ccl24   | Lipa    |
| Il12b   | Cxcl9    | Peli1    | Ccl3      | Cd244   | Tgfbr3  |
| Tnc     | Fcgr4    | Casp1    | Acod1     | Nectin1 | Col1a2  |
| Cxcl5   | Txn1     | Cd40     | Crem      | Ctsd    | Itgax   |
| Fpr1    | Anxa4    | Gem      | Il6       | Lpl     | Fut4    |
| Batf    | PSMB10   | Birc2    | Adamts4   | Pdgfrb  | Cebpa   |
| Tnfrsf4 | Ccl12    | Irf8     | Hif1a     | Ccl9    | Crip1   |
| Ccr5    | Mmp13    | Mob3c    | Socs3     | Ear3    | H2-Ob   |
| Ifna1   | Il15     | Nfkbiz   | Jun       | Des     | Il6ra   |
| Ifnb1   | Ccl2     | Skil     | Nfil3     | Cxcr3   | Acot11  |
| Il3ra   | Tap1     | Nod1     | Ptgs2     | Cd40lg  | Itgb7   |
| Ccl8    | Socs1    | C3       | Lif       | Il27ra  | Rapgef4 |
| Nod2    | Nampt    | Aoah     | Ccl7      | Lat     | Dusp6   |
| Ikbke   | Cxcl10   | Fpr2     | Stat3     | Sesn1   | Cx3cr1  |
| Cd276   | Psme2    | Mif      | Fscn1     | Fcer2a  | Vsir    |
| Tnfaip6 | Irf1     | Ccl5     | Socs2     | Mmp12   | Hdac5   |
| Cd47    | Tap2     | Marcksl1 | Serpib9   | Lat2    | Mapk14  |
| Tlr3    | Psmb9    | Flnb     | Gadd45b   | Ccr6    | Nfatc2  |
| Myc     | Psmb8    | Rgs16    | Traf1     | Tlr1    |         |
| Cybb    | Ly6c1    | Nlrp3    | Cxcl16    | S100a4  |         |
| Cd69    | Icam1    | Tlr2     | Gzma      | Ccr2    |         |
| Amica1  | Rgs1     | Tnfaip3  | Il10      | Kalrn   |         |

**Table S3. Heatmap gene order for Figure S3B (B6129SF2/J).**

Shown top to bottom on heatmap.

|          |          |          |           |         |         |
|----------|----------|----------|-----------|---------|---------|
| Cxcl11   | Birc2    | Psmb8    | Osm       | Il1r2   | Cd1d1   |
| Ccr5     | Rgs1     | Tap2     | Il1rap    | Hdc     | Xcr1    |
| Fpr1     | Cd40     | Stat1    | Ifit1bl2  | Cd14    | Tlr11   |
| Fcgr1    | Gem      | Ly6c1    | Il12b     | Trem1   | Sema5a  |
| Fpr2     | Cdkn1a   | Trex1    | Tnfrsf12a | C5ar1   | Cxcl12  |
| Aoah     | Csf1     | Isg15    | Emp1      | Prok2   | Mrc1    |
| Tlr2     | Adamts9  | Rin2     | Itga5     | H2-Q10  | Csf1r   |
| Nlrp3    | Rab20    | Sell     | Crem      | Csf3r   | Ptgs1   |
| Ikbke    | Cebpb    | Casp1    | Ccl7      | Il10    | Hpgd    |
| Nod2     | Socs3    | Mmp13    | Nfil3     | Ccl8    | Col14a1 |
| Il1a     | Jun      | Nod1     | Ptgs2     | Pdcd1   | Cd163   |
| Txn1     | Klrk1    | C3       | Lif       | Fcgr4   | Lat     |
| Cxcl9    | Kcnab1   | Tgm2     | Ccr7      | Batf    | Il27ra  |
| Traf1    | Tlr7     | Cd276    | Hif1a     | Tnfrsf4 | Fut4    |
| Serpinb9 | Mx2      | Tlr9     | Enc1      | Gzma    | Cebpa   |
| Gadd45b  | Usp18    | Ccl12    | Il6       | Ifnb1   | Sesn1   |
| Cxcl16   | Daxx     | PSMB10   | Il33      | Ifna1   | Cxcr3   |
| Socs2    | Ifit1bl1 | DDX58    | Serpine1  | Klk1    | Cd40lg  |
| Fscn1    | Trafd1   | Nfkbia   | Cxcl2     | Ear6    | Nectin1 |
| Nampt    | Irf7     | Maff     | Ier3      | Tgfbr3  | Lipa    |
| Cd274    | Tapbp    | Tnfaip3  | Il1rn     | Col1a2  | Ccr3    |
| Il15ra   | Cd47     | Cd80     | Ccl11     | Cd180   | Cav1    |
| Cxcl10   | H2-T23   | Adamts4  | Plaur     | Il6ra   | Ctsd    |
| Irf1     | H2-Q1    | Ccl4     | Nos2      | Dusp6   | Crip1   |
| Vwa5a    | Mx1      | Tnf      | Fosl1     | Tlr1    | Itgax   |
| Clic4    | Amica1   | Ccl3     | Ifng      | Hdac5   | Fcer2a  |
| Myd88    | Peli1    | Clec5a   | Cxcl1     | Acot11  | Lpl     |
| Il15     | Tnfsf10  | Cx3cl1   | Cxcl5     | Vsir    | Ccl9    |
| Rhoc     | Map2k1   | Marcksl1 | Ngf       | Cx3cr1  | Pdgfrb  |
| Anxa4    | DHX58    | Flnb     | Ptprk     | Nfatc2  | Kalrn   |
| Stat3    | Cybb     | Ccl5     | Edn1      | Mapk14  | Des     |
| Socs1    | Tlr3     | Mob3c    | Tnc       | Rapgef4 | Tek     |
| Nfkbiz   | IFIH1 b  | Rgs16    | Fcgr3     | Itgb7   | S100a4  |
| Hbegf    | IFIH1 a  | Tnfaip6  | Batf3     | H2-Ob   | Ccr2    |
| Tgfa     | Myc      | Mif      | Sphk1     | Ptprb   | Cd244   |
| Fas      | Cd69     | Cyr61    | S100a9    | Sema6d  | Ear3    |
| Ccl2     | Cd86     | Cebpd    | S100a8    | Mafb    | Ccl24   |
| Atf3     | Skil     | Il3ra    | Mmp8      | Cbr1    |         |
| Icam1    | Tap1     | Il1b     | Cxcr2     | Lat2    |         |
| Ccl2     | Psmb9    | Acod1    | Ccr1      | Ccr6    |         |
| Irf8     | Psme2    | Cldn1    | Ly6g      | Mmp12   |         |

**Table S4. Heatmap gene order for Figure S3C (MAVS<sup>-/-</sup>).**

Shown top to bottom on heatmap.

|         |           |          |         |          |         |
|---------|-----------|----------|---------|----------|---------|
| Batf3   | Cd80      | Gadd45b  | Icam1   | Ifit1bl1 | Crip1   |
| Cx3cl1  | Tnfaip3   | Serpinb9 | Irf1    | Map2k1   | Mafb    |
| Ptprk   | Tnfrsf12a | Hif1a    | Ccl12   | Cd69     | Acot11  |
| Fosl1   | Adamts9   | Rgs1     | Mmp13   | Myc      | Sema6d  |
| Nos2    | Emp1      | Fas      | Kcnab1  | Mx2      | Fcer2a  |
| Ngf     | Ccr7      | Tnfaip6  | Nod1    | Amica1   | Ccr6    |
| Trem1   | Plaur     | Nfil3    | Trex1   | Mx1      | Mmp12   |
| Fpr1    | Cxcl16    | Cebpb    | Fcgr1   | Ly6g     | Cx3cr1  |
| Ccl5    | Maff      | Rab20    | Klrk1   | Mmp8     | Cxcr3   |
| Gzma    | Il10      | Il33     | Stat1   | S100a8   | Sesn1   |
| Cyr61   | Sphk1     | Hbegf    | H2-Q1   | S100a9   | Cd1d1   |
| Cebpd   | Edn1      | Il1a     | H2-T23  | C5ar1    | Cbr1    |
| Fcgr3   | Itga5     | Il3ra    | Ly6c1   | H2-Q10   | Mapk14  |
| Ikbke   | Cxcl2     | Tlr9     | Tapbp   | Ccr1     | Vsir    |
| Cd14    | Ier3      | Tgfa     | Irf7    | Csf3r    | Hdac5   |
| Tnc     | Cxcl1     | Gem      | PSMB10  | Cxcr2    | Nfatc2  |
| Il1rap  | Serpine1  | Socs1    | Psme2   | Klk1     | Il27ra  |
| Clec5a  | Il12b     | Stat3    | Tap1    | Prok2    | Itgb7   |
| Il1b    | Nod2      | Clic4    | Tap2    | Ccl24    | Rapgef4 |
| Nlrp3   | Ifna1     | Vwa5a    | Psmb8   | Ear6     | H2-Ob   |
| Tlr2    | Ifnb1     | Cd274    | Psmb9   | Ccl9     | Il6ra   |
| Cldn1   | Cd276     | Cxcl10   | Isg15   | Cd244    | Lipa    |
| Cxcl5   | Pdcd1     | Il15     | Ccr5    | Ctsd     | Ptgs1   |
| Acod1   | Tnfrsf4   | Nampt    | Tlr3    | Lpl      | Ccr2    |
| Ifng    | Batf      | Osm      | Cd47    | Ccr3     | Tek     |
| Il6     | Mif       | Jun      | Tlr7    | Ear3     | Cd163   |
| Lif     | Fcgr4     | Socs3    | Myd88   | Des      | Mrc1    |
| Ptgs2   | Fscn1     | Cdkn1a   | Casp1   | Cav1     | Csf1r   |
| Adamts4 | Rhoc      | Nfkbiz   | Rin2    | Pdgfrb   | Ptprb   |
| Ccl3    | Tgm2      | Cd40     | Sell    | Lat      | Hpgd    |
| Ccl4    | Ifit1bl2  | Skil     | Cd86    | Kalrn    | Sema5a  |
| Crem    | Aoah      | Irf8     | Peli1   | S100a4   | Col14a1 |
| Il1r2   | Fpr2      | Mob3c    | Cybb    | Nectin1  | Cxcl12  |
| Hdc     | Tnf       | Ccl8     | DDX58   | Cd180    | Tlr11   |
| Ccl11   | Socs2     | Anxa4    | DHX58   | Lat2     | Xcr1    |
| Il1rn   | Traf1     | Txn1     | Tnfsf10 | Tlr1     | Col1a2  |
| Rgs16   | Nfkbia    | C3       | Trafd1  | Cd40lg   | Tgfbr3  |
| Csf1    | Atf3      | Cxcl9    | IFIH1 a | Dusp6    |         |
| Enc1    | Il15ra    | Marcks1  | IFIH1 b | Fut4     |         |
| Ccl2    | Ccl2      | Flnb     | Daxx    | Itgax    |         |
| Ccl7    | Cxcl11    | Birc2    | Usp18   | Cebpa    |         |

| <b>Table S5. 2way ANOVA results for Figure 5A.</b>   |                   |                           |                     |                         |
|------------------------------------------------------|-------------------|---------------------------|---------------------|-------------------------|
| Sidak's multiple comparisons post-test for Figure 5A |                   |                           |                     |                         |
| <b>Comparison</b>                                    | <b>Mean Diff.</b> | <b>95.00% CI of diff.</b> | <b>Significant?</b> | <b>Adjusted P Value</b> |
| <b>WT - MAVS<sup>-/-</sup></b>                       |                   |                           |                     |                         |
| PBS                                                  | 0                 | -640.0 to 640.0           | No                  | >0.9999                 |
| 5'ppp-hpRNA                                          | 0                 | -640.0 to 640.0           | No                  | >0.9999                 |
| R848                                                 | 0                 | -640.0 to 640.0           | No                  | >0.9999                 |
| Poly I:C                                             | 0                 | -678.8 to 678.8           | No                  | >0.9999                 |
| hEPO Process A (U)                                   | 83.27             | -556.7 to 723.3           | No                  | >0.9999                 |
| hEPO Process A (1mΨ)                                 | 1121              | 481.5 to 1762             | Yes                 | <0.0001                 |
| hEPO Process B (U)                                   | 1072              | 432.4 to 1712             | Yes                 | <0.0001                 |
| hEPO Process B (1mΨ)                                 | 823.8             | 145.0 to 1503             | Yes                 | 0.0078                  |
| Poly (U) 19mer                                       | 0                 | -678.8 to 678.8           | No                  | >0.9999                 |
| Poly (1mΨ) 19mer                                     | 0                 | -640.0 to 640.0           | No                  | >0.9999                 |
| Tukey's multiple comparisons post-test for Figure 5A |                   |                           |                     |                         |
| <b>Comparisons</b>                                   | <b>Mean Diff.</b> | <b>95.00% CI of diff.</b> | <b>Significant?</b> | <b>Adjusted P Value</b> |
| <b>WT</b>                                            |                   |                           |                     |                         |
| hEPO Process A (U) vs. hEPO Process A (1mΨ)          | -1186             | -1909 to -462.1           | Yes                 | <0.0001                 |
| hEPO Process A (U) vs. hEPO Process B (U)            | -975.7            | -1699 to -252.2           | Yes                 | 0.0014                  |
| hEPO Process A (1mΨ) vs. hEPO Process B (1mΨ)        | -65.39            | -788.9 to 658.1           | No                  | >0.9999                 |
| hEPO Process B (U) vs. hEPO Process B (1mΨ)          | -275.3            | -998.9 to 448.2           | No                  | 0.9633                  |
| Poly (U) 19mer vs. Poly (1mΨ) 19mer                  | 0                 | -723.5 to 723.5           | No                  | >0.9999                 |
| <b>MAVS<sup>-/-</sup></b>                            |                   |                           |                     |                         |
| hEPO Process A (U) vs. hEPO Process A (1mΨ)          | -147.4            | -871.0 to 576.1           | No                  | 0.9996                  |
| hEPO Process A (U) vs. hEPO Process B (U)            | 13.43             | -710.1 to 737.0           | No                  | >0.9999                 |
| hEPO Process A (1mΨ) vs. hEPO Process B (1mΨ)        | -363.1            | -1130 to 404.4            | No                  | 0.8709                  |
| hEPO Process B (U) vs. hEPO Process B (1mΨ)          | -523.9            | -1291 to 243.5            | No                  | 0.4496                  |
| Poly (U) 19mer vs. Poly (1mΨ) 19mer                  | 0                 | -767.4 to 767.4           | No                  | >0.9999                 |



**Table S6. 2way ANOVA of data from Figure 5B.**

Sidak's multiple comparisons post-test for Figure 5B

| Comparison                     | Mean Diff. | 95.00% CI of diff. | Significant? | Adjusted P Value |
|--------------------------------|------------|--------------------|--------------|------------------|
| <b>WT - MAVS<sup>-/-</sup></b> |            |                    |              |                  |
| PBS                            | 120.1      | -4012 to 4252      | No           | >0.9999          |
| 5'ppp-hpRNA                    | 40072      | 35940 to 44204     | Yes          | <0.0001          |
| R848                           | 140        | -3992 to 4272      | No           | >0.9999          |
| Poly I:C                       | 1592       | -2790 to 5975      | No           | 0.9711           |
| hEPO Process A (U)             | 8298       | 4166 to 12430      | Yes          | <0.0001          |
| hEPO Process A (1mΨ)           | 2547       | -1585 to 6679      | No           | 0.5638           |
| hEPO Process B (U)             | 2815       | -1317 to 6947      | No           | 0.4212           |
| hEPO Process B (1mΨ)           | 129.8      | -4253 to 4512      | No           | >0.9999          |
| Poly (U) 19mer                 | 2797       | -1586 to 7179      | No           | 0.5146           |
| Poly (1mΨ) 19mer               | 240.1      | -3892 to 4372      | No           | >0.9999          |

Tukey's multiple comparisons post-test for Figure 5B

| Comparisons                                   | Mean Diff. | 95.00% CI of diff. | Significant? | Adjusted P Value |
|-----------------------------------------------|------------|--------------------|--------------|------------------|
| <b>WT</b>                                     |            |                    |              |                  |
| hEPO Process A (U) vs. hEPO Process A (1mΨ)   | 10761      | 6089 to 15432      | Yes          | <0.0001          |
| hEPO Process A (U) vs. hEPO Process B (U)     | 5285       | 613.3 to 9956      | Yes          | 0.0145           |
| hEPO Process A (1mΨ) vs. hEPO Process B (1mΨ) | 2449       | -2222 to 7121      | No           | 0.7873           |
| hEPO Process B (U) vs. hEPO Process B (1mΨ)   | 7925       | 3254 to 12597      | Yes          | <0.0001          |
| Poly (U) 19mer vs. Poly (1mΨ) 19mer           | 6684       | 2013 to 11356      | Yes          | 0.0005           |
| <b>MAVS<sup>-/-</sup></b>                     |            |                    |              |                  |
| hEPO Process A (U) vs. hEPO Process A (1mΨ)   | 5009       | 338.0 to 9680      | Yes          | 0.0258           |
| hEPO Process A (U) vs. hEPO Process B (U)     | -198.8     | -4870 to 4472      | No           | >0.9999          |
| hEPO Process A (1mΨ) vs. hEPO Process B (1mΨ) | 32.27      | -4922 to 4987      | No           | >0.9999          |
| hEPO Process B (U) vs. hEPO Process B (1mΨ)   | 5240       | 285.7 to 10195     | Yes          | 0.0296           |
| Poly (U) 19mer vs. Poly (1mΨ) 19mer           | 4128       | -826.8 to 9082     | No           | 0.1864           |

**Table S7. 2way ANOVA of data from Figure 5C.**

Sidak's multiple comparisons post-test for Figure 5C

| Comparison                     | Mean Diff. | 95.00% CI of diff. | Significant? | Adjusted P Value |
|--------------------------------|------------|--------------------|--------------|------------------|
| <b>WT - MAVS<sup>-/-</sup></b> |            |                    |              |                  |
| PBS                            | 0.514      | -14.48 to 15.51    | No           | >0.9999          |
| 5'ppp-hpRNA                    | 76.12      | 61.12 to 91.12     | Yes          | <0.0001          |
| R848                           | 8.88       | -6.118 to 23.88    | No           | 0.6188           |
| Poly I:C                       | 3.42       | -12.49 to 19.33    | No           | 0.9996           |
| hEPO Process A (U)             | 18.38      | 3.382 to 33.38     | Yes          | 0.007            |
| hEPO Process A (1mΨ)           | 39.22      | 24.22 to 54.22     | Yes          | <0.0001          |
| hEPO Process B (U)             | 14.64      | -0.3575 to 29.64   | No           | 0.0605           |
| hEPO Process B (1mΨ)           | 3.665      | -12.24 to 19.57    | No           | 0.9992           |
| Poly (U) 19mer                 | 4.54       | -11.37 to 20.45    | No           | 0.9952           |
| Poly (1mΨ) 19mer               | 0.108      | -14.89 to 15.11    | No           | >0.9999          |

Tukey's multiple comparisons post-test for Figure 5C

| Comparisons                                   | Mean Diff. | 95.00% CI of diff. | Significant? | Adjusted P Value |
|-----------------------------------------------|------------|--------------------|--------------|------------------|
| <b>WT</b>                                     |            |                    |              |                  |
| hEPO Process A (U) vs. hEPO Process A (1mΨ)   | 27.16      | 10.21 to 44.11     | Yes          | <0.0001          |
| hEPO Process A (U) vs. hEPO Process B (U)     | 18.88      | 1.925 to 35.83     | Yes          | 0.0173           |
| hEPO Process A (1mΨ) vs. hEPO Process B (1mΨ) | 47.24      | 30.28 to 64.19     | Yes          | <0.0001          |
| hEPO Process B (U) vs. hEPO Process B (1mΨ)   | 55.52      | 38.56 to 72.47     | Yes          | <0.0001          |
| Poly (U) 19mer vs. Poly (1mΨ) 19mer           | 82.13      | 65.18 to 99.08     | Yes          | <0.0001          |
| <b>MAVS<sup>-/-</sup></b>                     |            |                    |              |                  |
| hEPO Process A (U) vs. hEPO Process A (1mΨ)   | 48         | 31.05 to 64.95     | Yes          | <0.0001          |
| hEPO Process A (U) vs. hEPO Process B (U)     | 15.14      | -1.815 to 32.09    | No           | 0.1207           |
| hEPO Process A (1mΨ) vs. hEPO Process B (1mΨ) | 11.68      | -6.301 to 29.67    | No           | 0.5219           |
| hEPO Process B (U) vs. hEPO Process B (1mΨ)   | 44.54      | 26.56 to 62.53     | Yes          | <0.0001          |
| Poly (U) 19mer vs. Poly (1mΨ) 19mer           | 77.7       | 59.71 to 95.68     | Yes          | <0.0001          |

Figure S1.

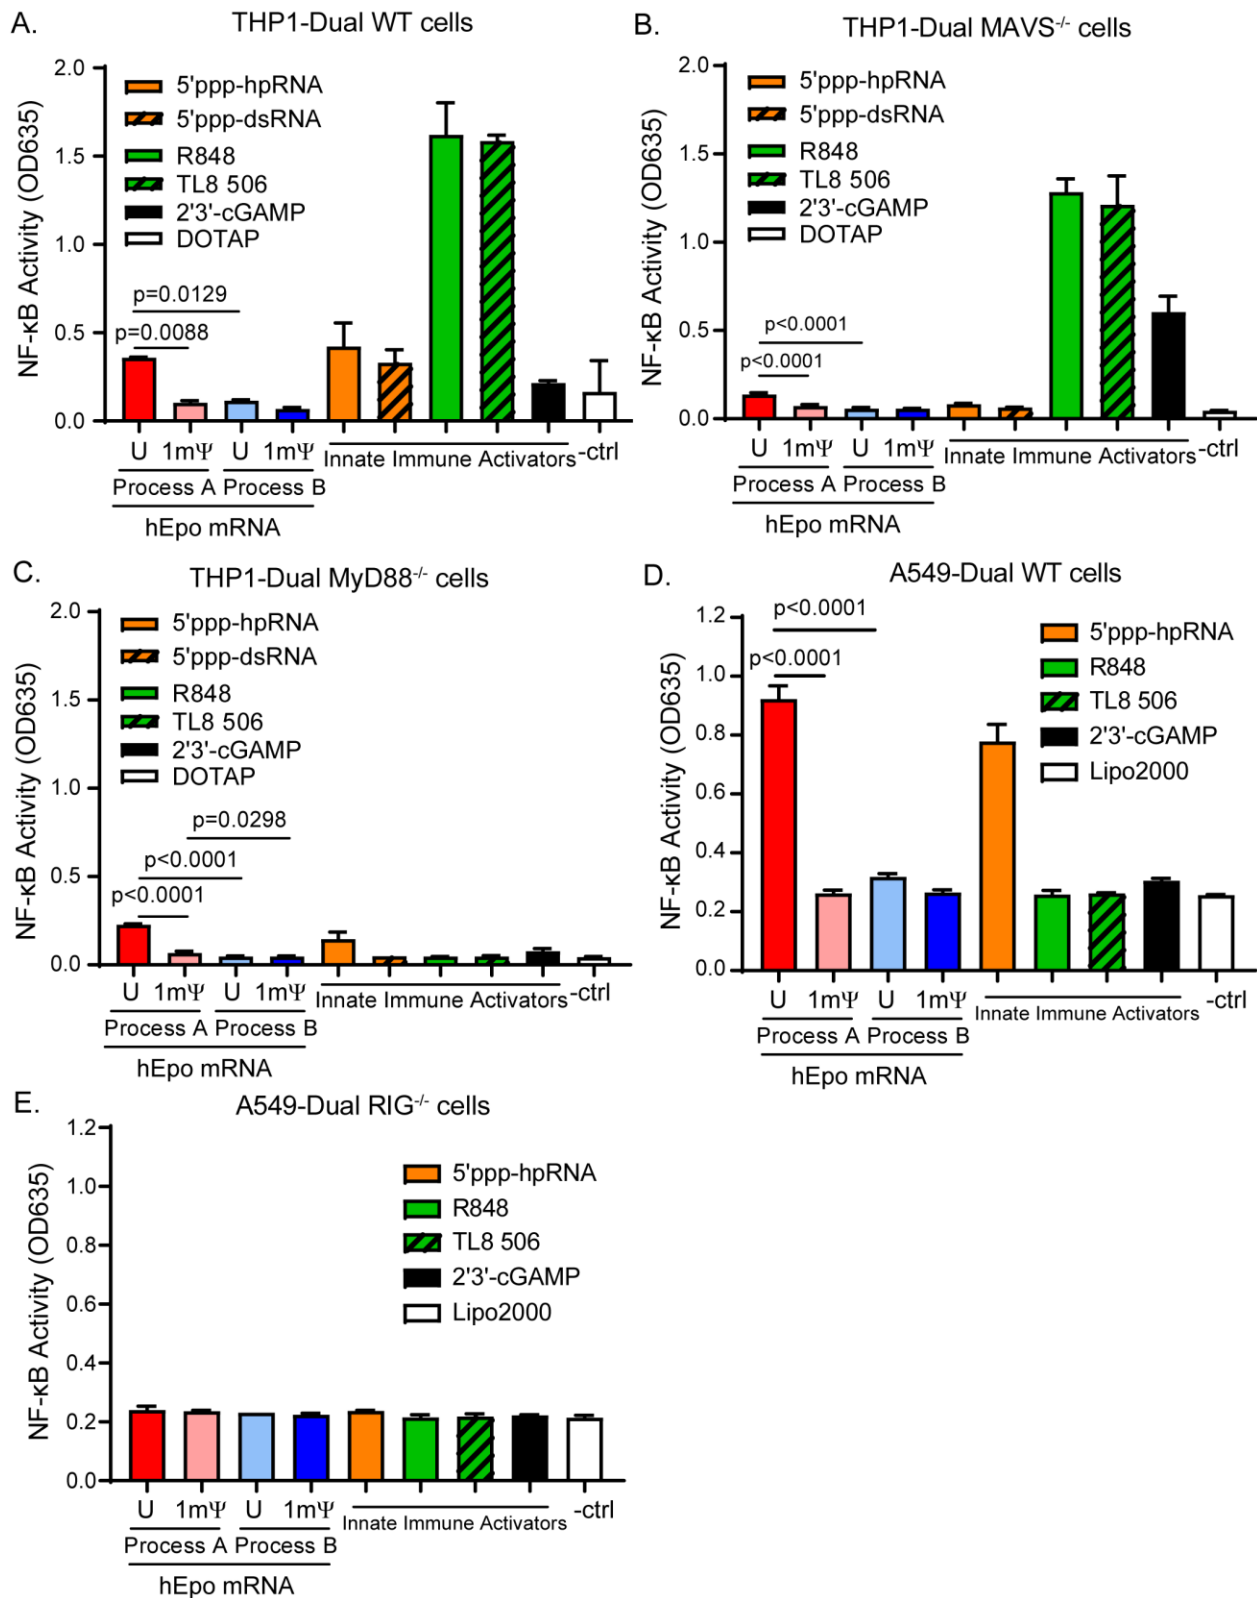

Figure S2.

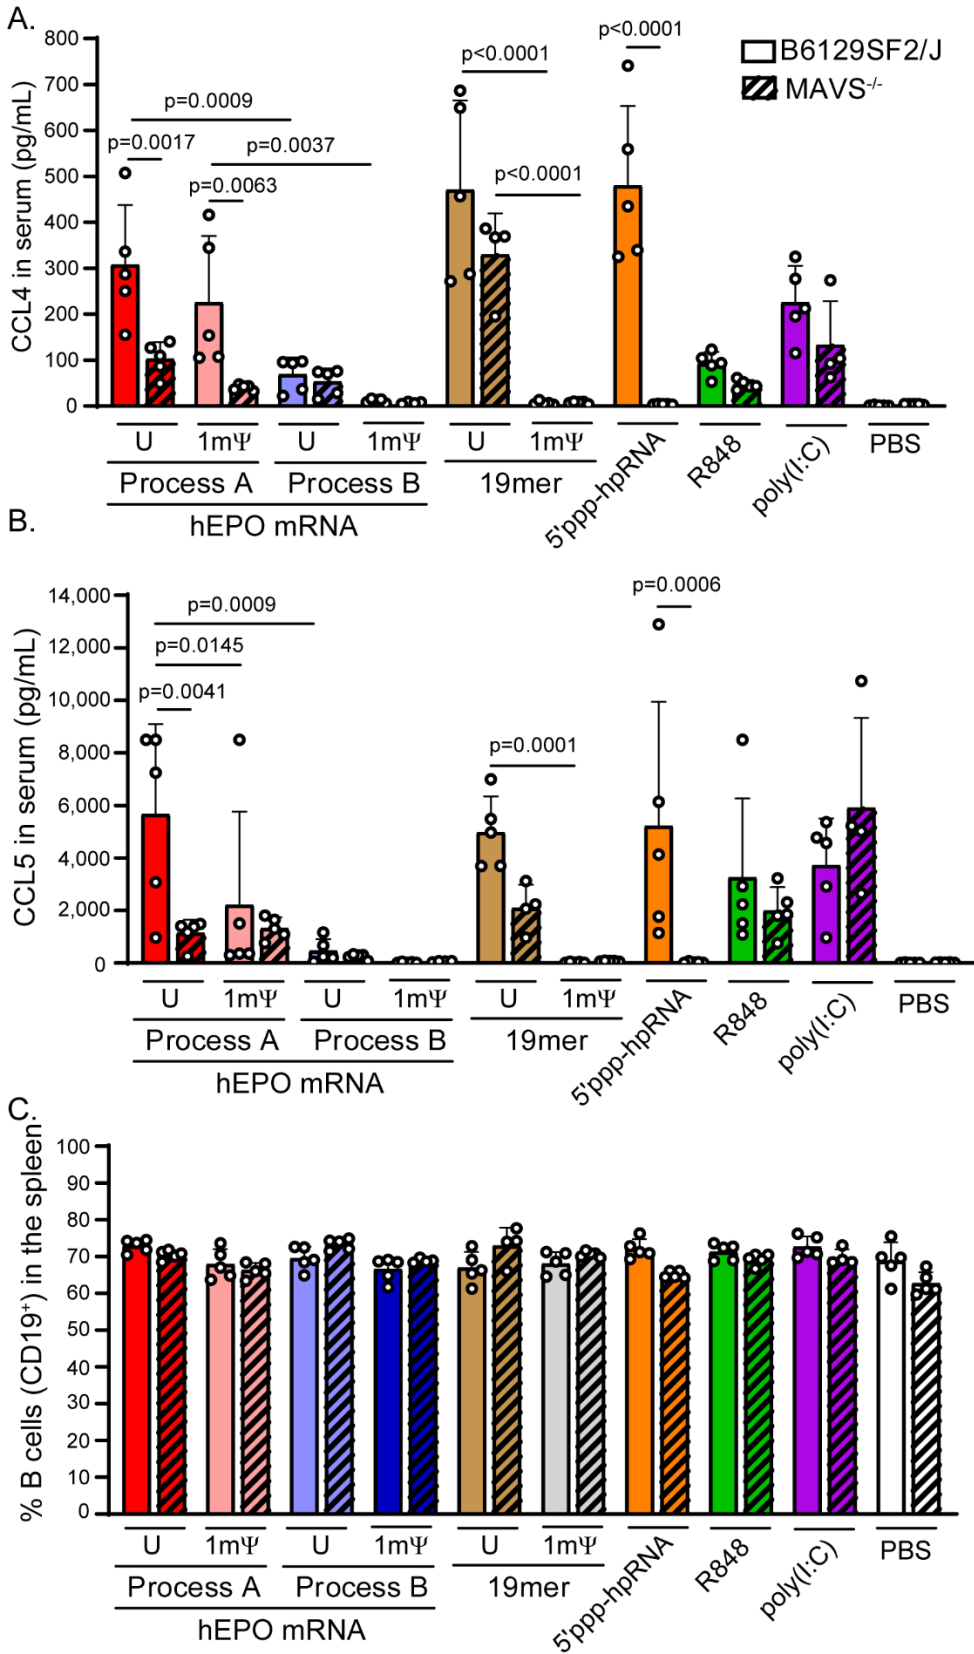

Figure S3.

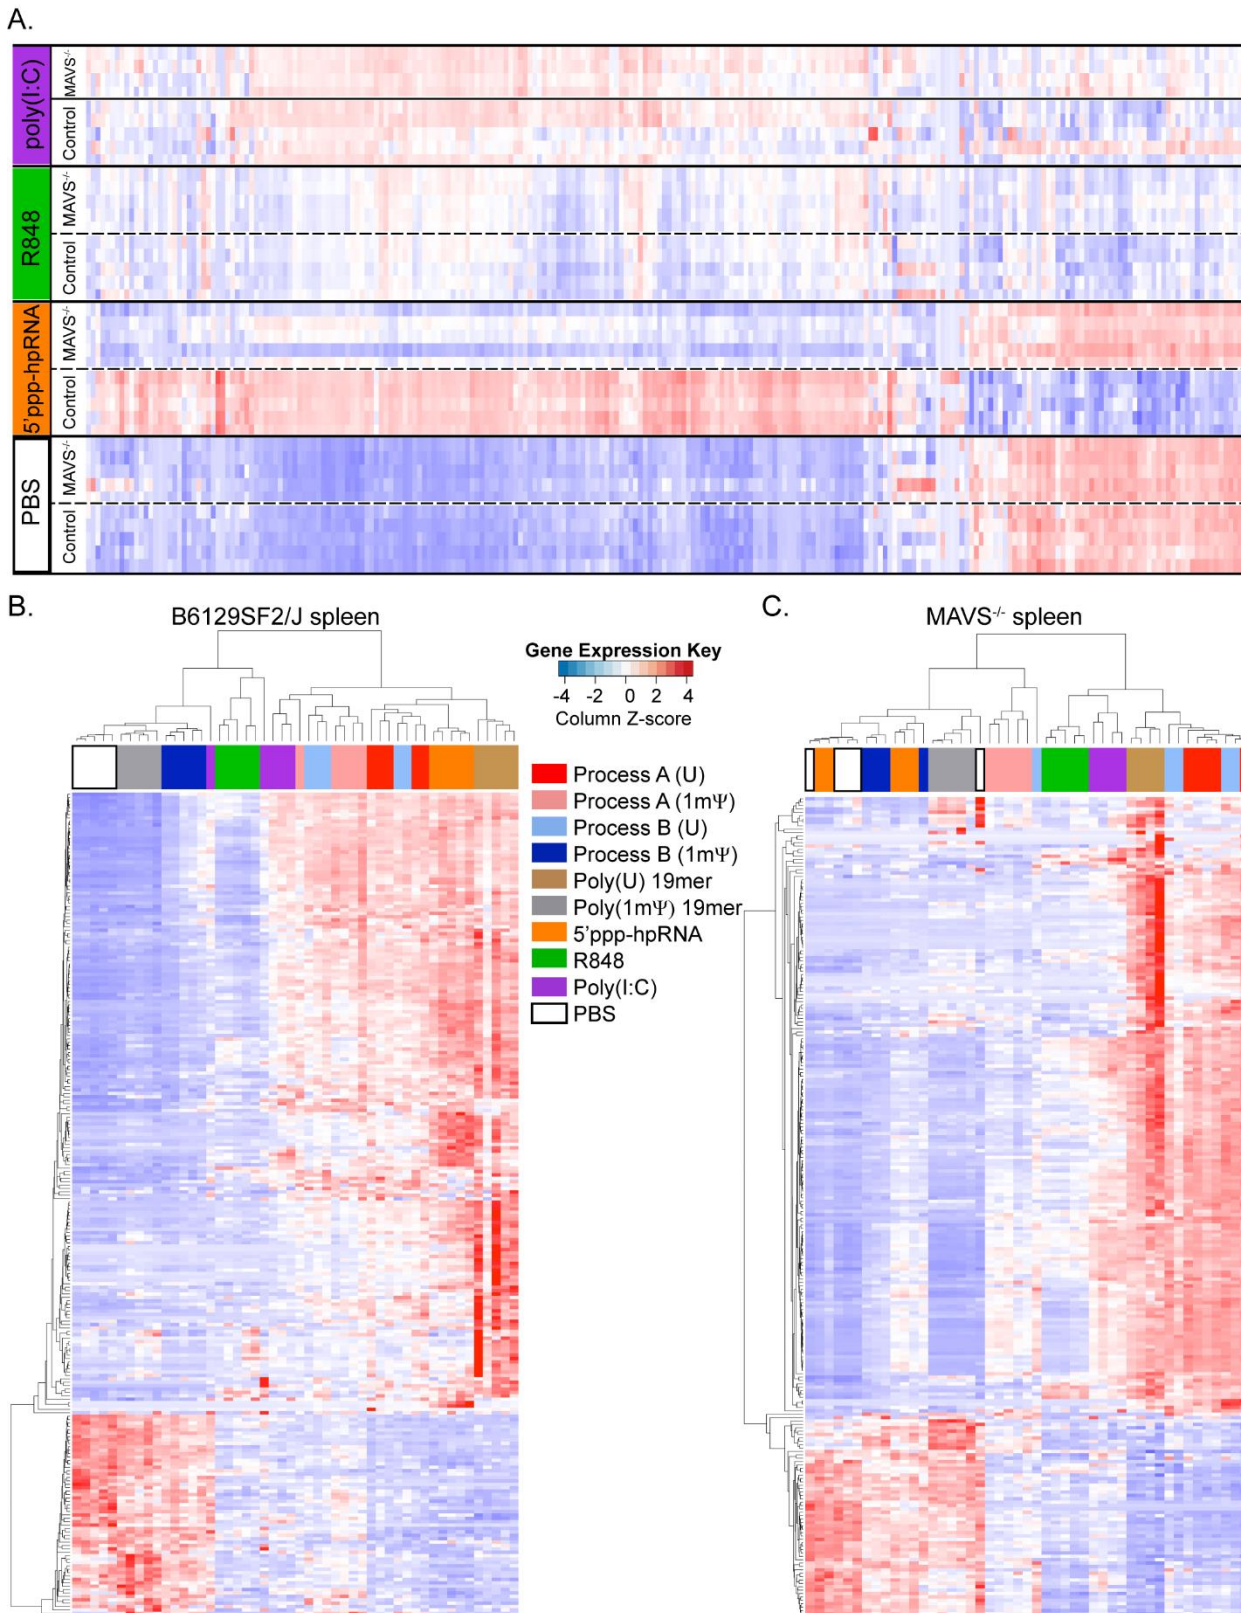

Supplement: aaz6893_SM.pdf [file aaz6893_SM.pdf]
